# Supplementary material
Source: Springer Nature journal article supplement (https://publikationen.ub.uni-frankfurt.de/files/7207/12943_2009_465_MOESM6_ESM.PDF)
Supplement: MOESM6 [file 12943_2009_465_MOESM6_ESM.PDF]

**Additional file 6.** Angiogenesis-related genes that are differentially expressed between the parental chemosensitive UKF-NB-3 neuroblastoma cell line and the doxorubicin resistant sub-line UKF-NB-3<sup>r</sup>DOX<sup>20</sup> as indicated by PANTHER pathway analysis of gene microarray (HGU133 Plus 2.0) expression data.

| <b>Comparison UKF-NB-3 against UKF-NB-3<sup>r</sup>DOX<sup>20</sup></b> |                                                                              |                                                                                                                                                         |
|-------------------------------------------------------------------------|------------------------------------------------------------------------------|---------------------------------------------------------------------------------------------------------------------------------------------------------|
| Gene ID                                                                 | Encoded protein                                                              | Fold change<br>UKF-NB-3 <sup>r</sup> DOX <sup>20</sup> /UKF-NB-3<br>(multiple-testing corrected p-value based on three biological replicates)           |
| DLK1                                                                    | delta-like 1 homolog (Drosophila)                                            | 282,14 (2.85 x 10 <sup>-9</sup> )                                                                                                                       |
| TCF7L2                                                                  | transcription factor 7-like 2 (T-cell specific, HMG-box)                     | 5,72 (4.30 x 10 <sup>-4</sup> )<br>3,11 (1.57 x 10 <sup>-4</sup> )<br>2,47 (7.40 x 10 <sup>-3</sup> )<br>1,74 (1.80 x 10 <sup>-4</sup> )<br>1,74 (0.03) |
| DLL1                                                                    | delta-like 1 (Drosophila)                                                    | 4,97 (1.79 x 10 <sup>-5</sup> )                                                                                                                         |
| SHC1                                                                    | SHC (Src homology 2 domain containing) transforming protein 1                | 3,90 (3.55 x 10 <sup>-6</sup> )<br>2,11 (1.90 x 10 <sup>-5</sup> )                                                                                      |
| FGFR3                                                                   | fibroblast growth factor receptor 3 (achondroplasia, thanatophoric dwarfism) | 3,75 (6.57 x 10 <sup>-6</sup> )<br>1.10 (0.03)                                                                                                          |
| NOTCH3                                                                  | Notch homolog 3 (Drosophila)                                                 | 2,99 (4.01 x 10 <sup>-3</sup> )                                                                                                                         |
| SFRP1                                                                   | secreted frizzled-related protein 1                                          | 2,89 (2.40 x 10 <sup>-4</sup> )<br>2,88 (1.83 x 10 <sup>-4</sup> )<br>2,62 (1.74 x 10 <sup>-5</sup> )                                                   |
| MAPK9                                                                   | mitogen-activated protein kinase 9                                           | 2,69 (5.76 x 10 <sup>-5</sup> )<br>1,83 (1.60 x 10 <sup>-4</sup> )                                                                                      |
| DLL3                                                                    | delta-like 3 (Drosophila)                                                    | 2,42 (1.64 x 10 <sup>-3</sup> )<br>2,41 (3.66 x 10 <sup>-3</sup> )                                                                                      |
| AKT2                                                                    | v-akt murine thymoma viral oncogene homolog 2                                | 2,33 (1.74 x 10 <sup>-3</sup> )<br>2,30 (1.25 x 10 <sup>-4</sup> )<br>1,93 (2.89 x 10 <sup>-3</sup> )                                                   |

|         |                                                                                                                                                                                                             |                                                                                 |
|---------|-------------------------------------------------------------------------------------------------------------------------------------------------------------------------------------------------------------|---------------------------------------------------------------------------------|
|         |                                                                                                                                                                                                             | 1.33 (0.01)<br>1.17 (0.01)                                                      |
| FGFR2   | fibroblast growth factor receptor 2<br>(bacteria-expressed kinase,<br>keratinocyte growth factor receptor,<br>craniofacial dysostosis 1, Crouzon<br>syndrome, Pfeiffer syndrome,<br>Jackson-Weiss syndrome) | 2,20 ( $5.30 \times 10^{-4}$ )<br>1,89 ( $2.42 \times 10^{-4}$ )                |
| GRB2    | growth factor receptor-bound protein<br>2                                                                                                                                                                   | 2,20 ( $3.69 \times 10^{-4}$ )<br>1,82 ( $2.28 \times 10^{-4}$ )                |
| FGFR1   | fibroblast growth factor receptor 1<br>(fms-related tyrosine kinase 2,<br>Pfeiffer syndrome)                                                                                                                | 2,08 ( $4.36 \times 10^{-3}$ )<br>1,51 (0.03)<br>1,47 (0.03)                    |
| PAK4    | p21(CDKN1A)-activated kinase 4                                                                                                                                                                              | 1,98 (0.02)<br>1,88 (0.01))                                                     |
| RHOF    | Ras homolog gene family, member<br>F (in filopodia)                                                                                                                                                         | 1,92 (0.03)<br>1,59 ( $8.24 \times 10^{-3}$ )                                   |
| PAK7    | p21(CDKN1A)-activated kinase 7                                                                                                                                                                              | 1,88 ( $7.41 \times 10^{-4}$ )<br>1,41 ( $4.55 \times 10^{-4}$ )                |
| ARHGAP1 | Rho GTPase activating protein 1                                                                                                                                                                             | 1,85 (0.04)                                                                     |
| BCR     | breakpoint cluster region                                                                                                                                                                                   | 1,80 (0.01)                                                                     |
| PDLIM7  | PDZ and LIM domain 7 (enigma)                                                                                                                                                                               | 1,80 (0.01)<br>1.06 ( $3,24 \times 10^{-3}$ )                                   |
| PIK3CB  | phosphoinositide-3-kinase, catalytic,<br>beta polypeptide                                                                                                                                                   | 1,74 ( $6.64 \times 10^{-3}$ )                                                  |
| STAT1   | signal transducer and activator of<br>transcription 1, 91kDa                                                                                                                                                | 1,72 ( $1.21 \times 10^{-4}$ )                                                  |
| PIK3C2B | phosphoinositide-3-kinase, class 2,<br>beta polypeptide                                                                                                                                                     | 1,6 ( $6.94 \times 10^{-3}$ )                                                   |
| PAK2    | p21 (CDKN1A)-activated kinase 2                                                                                                                                                                             | 1,56 ( $5.78 \times 10^{-3}$ )<br>1,55 ( $1.20 \times 10^{-3}$ )                |
| BIRC5   | baculoviral IAP repeat-containing 5<br>(survivin)                                                                                                                                                           | 1,54 ( $7.37 \times 10^{-3}$ )<br>1,54 ( $2.48 \times 10^{-3}$ )<br>1,50 (0.03) |
| DVL2    | dishevelled, dsh homolog 2<br>(Drosophila)                                                                                                                                                                  | 1,54 (0.01)<br>1,32 (0.03)                                                      |

|                                            |                                                                                                                                      |                                 |
|--------------------------------------------|--------------------------------------------------------------------------------------------------------------------------------------|---------------------------------|
| BRAF                                       | v-raf murine sarcoma viral oncogene homolog B1                                                                                       | 1,53 (0.01)                     |
| MAP3K1                                     | mitogen-activated protein kinase kinase kinase 1                                                                                     | 1,53 (0.03)                     |
| ABR                                        | active BCR-related gene                                                                                                              | 1,47 (0.03)                     |
| MAPKAPK2                                   | mitogen-activated protein kinase-activated protein kinase 2                                                                          | 1,45 (1.83 x 10 <sup>-3</sup> ) |
| DOK1                                       | docking protein 1, 62kDa (downstream of tyrosine kinase 1)                                                                           | 1,44 (0.01)                     |
| MAPK12                                     | mitogen-activated protein kinase 12                                                                                                  | 1,41 (7.63 x 10 <sup>-3</sup> ) |
| NRAS                                       | neuroblastoma RAS viral (v-ras) oncogene homolog                                                                                     | 1,40 (0.02)                     |
| AKT1                                       | v-akt murine thymoma viral oncogene homolog 1                                                                                        | 1,38 (0.02)                     |
| JUN                                        | jun oncogene                                                                                                                         | 1,38 (0.01)<br>1.28 (0.02)      |
| WNT5A                                      | wingless-type MMTV integration site family, member 5A                                                                                | 1,29 (4.95 x 10 <sup>-3</sup> ) |
| PLCG1                                      | phospholipase C, gamma 1                                                                                                             | 1,28 (0.03)                     |
| TALDO1                                     | transaldolase 1                                                                                                                      | 1,19 (0.04)                     |
| HSH2D                                      | hematopoietic SH2 domain containing                                                                                                  | 0,93 (7.81 x 10 <sup>-3</sup> ) |
| LOC647836<br>///<br>LOC649279<br>/// WNT7B | wingless-type MMTV integration site family, member 7B /// similar to wingless-type MMTV integration site family, member 7B precursor | 0,89 (0.03)                     |
| MAPK14                                     | mitogen-activated protein kinase 14                                                                                                  | 0,82 (0.04)                     |
| KRAS                                       | v-Ki-ras2 Kirsten rat sarcoma viral oncogene homolog                                                                                 | 0,80 (0.03)                     |
| EPHA8                                      | EPH receptor A8                                                                                                                      | 0,77 (0.01)                     |
| GSK3A                                      | glycogen synthase kinase 3 alpha                                                                                                     | 0,75 (0.04)                     |
| CTNNB1                                     |                                                                                                                                      | 0,72 (7.19 x 10 <sup>-4</sup> ) |

|        |                                                                        |                                                                    |
|--------|------------------------------------------------------------------------|--------------------------------------------------------------------|
|        | catenin (cadherin-associated protein), beta 1, 88kDa                   |                                                                    |
| WNT5B  | wingless-type MMTV integration site family, member 5B                  | 0,71 (0.04)                                                        |
| AXIN2  | axin 2 (conductin, axil)                                               | 0,70 (0.02)                                                        |
| MAPK1  | mitogen-activated protein kinase 1                                     | 0,69 (2.27 x 10 <sup>-3</sup> )                                    |
| MAPK8  | mitogen-activated protein kinase 8                                     | 0,68 (0.01)<br>0.66 (0.01)                                         |
| HRAS   | v-Ha-ras Harvey rat sarcoma viral oncogene homolog                     | 0,65 (0.04)                                                        |
| JAG2   | jagged 2                                                               | 0,62 (0.02)                                                        |
| PRKCE  | protein kinase C, epsilon                                              | 0,61 (1.06 x 10 <sup>-3</sup> )                                    |
| PTPN11 | protein tyrosine phosphatase, non-receptor type 11 (Noonan syndrome 1) | 0,61 (0.02)                                                        |
| PIK3R1 | phosphoinositide-3-kinase, regulatory subunit 1 (p85 alpha)            | 0,59 (0.01)<br>0.48 (0.03)<br>0.45 (9.66 x 10 <sup>-3</sup> )      |
| EPHA5  | EPH receptor A5                                                        | 0,58 (0.02)                                                        |
| GRB10  | growth factor receptor-bound protein 10                                | 0,58 (0.01)                                                        |
| PAK3   | p21 (CDKN1A)-activated kinase 3                                        | 0,56 (0.01)                                                        |
| FRS2   | fibroblast growth factor receptor substrate 2                          | 0,49 (9.11 x 10 <sup>-3</sup> )                                    |
| SOS1   | son of sevenless homolog 1 (Drosophila)                                | 0,47 (2.37 x 10 <sup>-3</sup> )<br>0.25 (2.42 x 10 <sup>-3</sup> ) |
| FRZB   | frizzled-related protein                                               | 0,45 (8.80 x 10 <sup>-5</sup> )<br>0.40 (2.46 x 10 <sup>-5</sup> ) |
| EPHA7  | EPH receptor A7                                                        | 0,44 (2.80 x 10 <sup>-3</sup> )<br>0.30 (1.50 x 10 <sup>-3</sup> ) |
| FZD8   | frizzled homolog 8 (Drosophila)                                        | 0,41 (4.54 x 10 <sup>-4</sup> )                                    |
| MAPK10 | mitogen-activated protein kinase 10                                    | 0,41 (5.24 x 10 <sup>-4</sup> )                                    |
| SPHK1  |                                                                        | 0,41 (2.10 x 10 <sup>-4</sup> )                                    |

|       |                         |                                |
|-------|-------------------------|--------------------------------|
|       | sphingosine kinase 1    |                                |
| PRKCA | protein kinase C, alpha | 0,09 ( $1.75 \times 10^{-6}$ ) |
